# Supplementary material
Source: MDPI journal article supplement (https://www.mdpi.com/search?q=ijms-18-02075)
Supplement: s001 [file ijms-18-02075-s001.pdf]

# Cross-Linked Amylose Bio-Plastic: A Transgenic-Based Compostable Plastic Alternative

Domenico Sagnelli <sup>1,\*</sup>, Kourosh Hooshmand <sup>1</sup>, Gerdi Christine Kemmer <sup>1</sup>, Jacob J.K. Kirkensgaard <sup>2</sup>, Kell Mortensen <sup>2</sup>, Valeria Giosafatto <sup>3</sup>, Mette Holse <sup>4</sup>, Kim H. Hebelstrup <sup>5</sup>, Jinsong Bao <sup>6</sup>, Wolfgang Stelte <sup>7</sup>, Anne-Belinda Bjerre <sup>7</sup>, Andreas Blennow <sup>1</sup>

<sup>1</sup> Department of Plant and Environmental Sciences, University of Copenhagen, Denmark;

kourosh.hooshmand@agro.au.dk (K.H.); gzq355@alumni.ku.dk (G.C.K.); abl@plen.ku.dk (A.B.)

<sup>2</sup> Niels Bohr Institute, University of Copenhagen, Denmark; jjkk@nbi.ku.dk (J.J.K.K.); kell@nbi.ku.dk (K.M.)

<sup>3</sup> Department of Chemical Science, University of Naples, Italy; giosafat@unina.it;

<sup>4</sup> Department of Food Science, University of Copenhagen, Denmark; mettehulse@hotmail.com

<sup>5</sup> Department of Molecular Biology and Genetics, University of Aarhus, Denmark; kim.hebelstrup@mbg.au.dk

<sup>6</sup> Zhejiang University, Hangzhou, China; jsbao@zju.edu.cn

<sup>7</sup> Department of climate and energy, Danish technological institute, Denmark; wst@teknologisk.dk (W.S.);

anbj@teknologisk.dk (A.-B.B.)

\* Correspondence: dsagnelli@plen.ku.dk

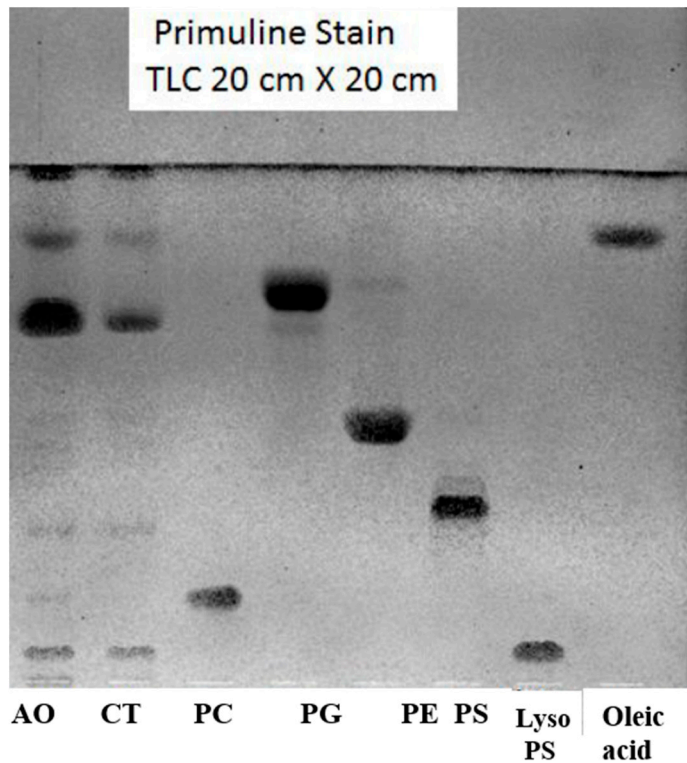

**Supplementary Figure 1.** Phospholipids determination. AO: amylose-only, CT: control (*Hordeum vulgare*) Standards: PC: Phosphatidylcholine, PG: Phosphatidylglycerol, PE: Phosphatidylethanolamine, PS: Phosphatidylserine, lysoPC: Lysophosphatidylcholine, and oleic acid (free fatty acid).

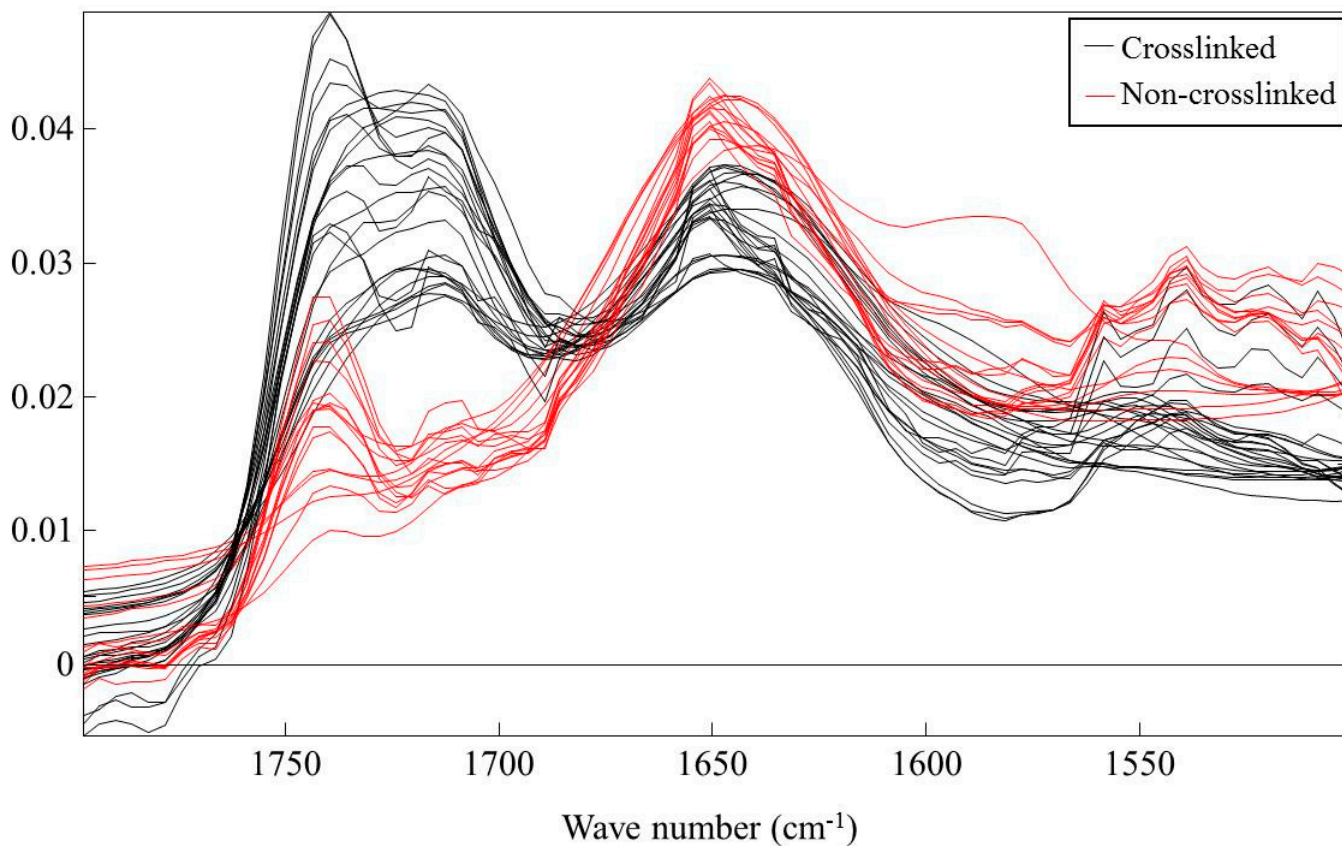

**Supplementary Figure 2:** MSC pre-processed FTIR spectra (1800-1500cm<sup>-1</sup>) obtained from analysis of the extrudates.

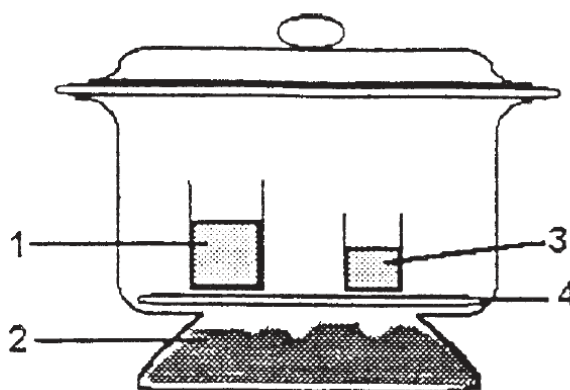

Supplementary Figure 3. Soil incubator with 1) potassium hydroxide solution, (2) soil, (3) water, and (4) perforated plate. Adapted from *ASTM-D5988-03, 2012*

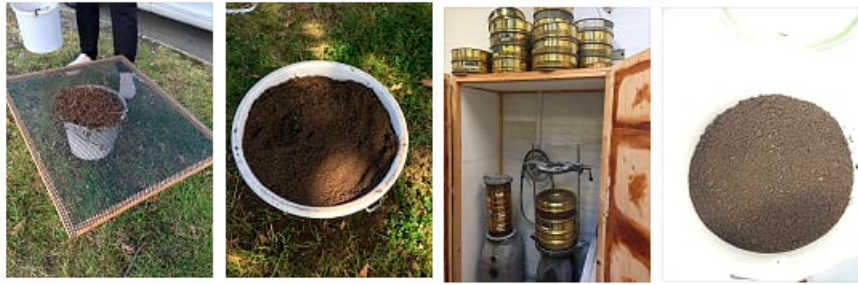

Supplementary Figure 4. Preparation of soil samples. Screening in a 10 mm mesh and a sieving tower with 2 mm screen.

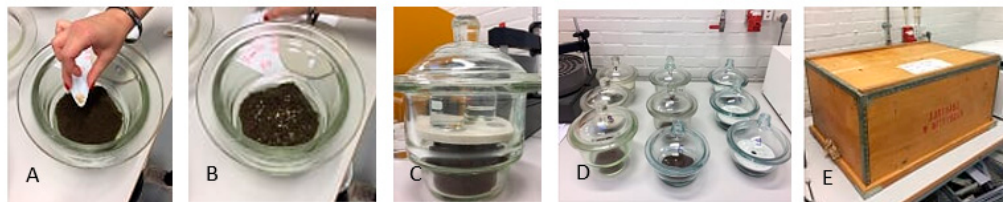

Supplementary Figure 5. A, B: Sample is spread out and covered with soil. E, D: Beakers with KOH (0.5 N) and water are added on top and the desiccators are sealed and placed into the darkened chamber in a climate controlled laboratory.

Supplementary table 1. CO<sub>2</sub> release during the biodegradation test of High amylose barley grains and reference barley grains.

| Time [days] | Evolved CO <sub>2</sub> High amylose barley grains [ml] |   |      | Evolved CO <sub>2</sub> Reference barley grains [ml] |   |      |
|-------------|---------------------------------------------------------|---|------|------------------------------------------------------|---|------|
|             |                                                         | ± |      |                                                      | ± |      |
| 1           | 1,24                                                    | ± | c    | 1,11                                                 | ± | 0,00 |
| 2           | 2,89                                                    | ± | 0,02 | 2,52                                                 | ± | 0,02 |
| 3           | 4,82                                                    | ± | 0,04 | 4,60                                                 | ± | 0,04 |
| 6           | 10,44                                                   | ± | 0,27 | 10,45                                                | ± | 0,11 |
| 7           | 12,83                                                   | ± | 0,30 | 12,86                                                | ± | 0,14 |
| 8           | 14,47                                                   | ± | 0,33 | 14,39                                                | ± | 0,20 |
| 11          | 17,62                                                   | ± | 0,35 | 17,23                                                | ± | 0,31 |
| 12          | 18,26                                                   | ± | 0,35 | 17,94                                                | ± | 0,32 |
| 13          | 19,01                                                   | ± | 0,35 | 18,70                                                | ± | 0,32 |
| 14          | 19,65                                                   | ± | 0,36 | 19,26                                                | ± | 0,33 |
| 16          | 21,67                                                   | ± | 0,40 | 21,07                                                | ± | 0,35 |
| 23          | 24,31                                                   | ± | 0,47 | 23,52                                                | ± | 0,40 |
| 25          | 25,14                                                   | ± | 0,48 | 24,39                                                | ± | 0,41 |
| 26          | 25,46                                                   | ± | 0,49 | 24,75                                                | ± | 0,41 |
| 27          | 25,70                                                   | ± | 0,49 | 24,99                                                | ± | 0,42 |
| 30          | 26,01                                                   | ± | 0,49 | 25,47                                                | ± | 0,42 |
| 34          | 26,72                                                   | ± | 0,50 | 26,36                                                | ± | 0,44 |
| 38          | 27,28                                                   | ± | 0,51 | 26,96                                                | ± | 0,46 |
| 51          | 29,06                                                   | ± | 0,55 | 28,73                                                | ± | 0,47 |
| 65          | 30,49                                                   | ± | 0,59 | 30,04                                                | ± | 0,50 |

Supplementary table 2. CO<sub>2</sub> release during the biodegradation test of bioplastics.

| Time [days] | Evolved CO <sub>2</sub> High amylose starch [ml] |   |      | Evolved CO <sub>2</sub> High amylose starch crosslinked [ml] |   |      | Evolved CO <sub>2</sub> Reference [ml] |   |       | Evolved CO <sub>2</sub> Reference crosslinked [ml] |   |      |
|-------------|--------------------------------------------------|---|------|--------------------------------------------------------------|---|------|----------------------------------------|---|-------|----------------------------------------------------|---|------|
|             |                                                  | ± |      |                                                              | ± |      |                                        | ± |       |                                                    | ± |      |
| 1           | 0,83                                             | ± | 0,83 | 0,83                                                         | ± | 0,02 | 0,82                                   | ± | 0,820 | 0,92                                               | ± | 0,02 |
| 2           | 1,58                                             | ± | 0,83 | 1,60                                                         | ± | 0,04 | 1,45                                   | ± | 0,824 | 1,68                                               | ± | 0,05 |
| 5           | 3,51                                             | ± | 0,84 | 3,99                                                         | ± | 0,05 | 3,46                                   | ± | 0,832 | 4,09                                               | ± | 0,06 |
| 6           | 4,25                                             | ± | 0,85 | 4,67                                                         | ± | 0,07 | 4,13                                   | ± | 0,842 | 4,78                                               | ± | 0,08 |
| 8           | 5,35                                             | ± | 0,88 | 5,81                                                         | ± | 0,10 | 5,43                                   | ± | 0,855 | 6,03                                               | ± | 0,10 |
| 13          | 8,60                                             | ± | 0,90 | 8,74                                                         | ± | 0,11 | 8,85                                   | ± | 0,908 | 9,03                                               | ± | 0,11 |
| 15          | 10,33                                            | ± | 0,90 | 10,75                                                        | ± | 0,11 | 10,48                                  | ± | 0,914 | 10,93                                              | ± | 0,12 |
| 18          | 11,88                                            | ± | 0,91 | 12,22                                                        | ± | 0,15 | 12,12                                  | ± | 0,933 | 12,46                                              | ± | 0,16 |
| 21          | 13,25                                            | ± | 0,92 | 13,35                                                        | ± | 0,17 | 13,63                                  | ± | 0,946 | 13,64                                              | ± | 0,17 |
| 25          | 15,04                                            | ± | 0,94 | 14,65                                                        | ± | 0,20 | 15,35                                  | ± | 0,983 | 14,92                                              | ± | 0,19 |
| 27          | 16,21                                            | ± | 0,95 | 15,48                                                        | ± | 0,20 | 16,61                                  | ± | 1,012 | 15,77                                              | ± | 0,21 |
| 32          | 19,27                                            | ± | 0,95 | 18,19                                                        | ± | 0,22 | 19,70                                  | ± | 1,021 | 18,11                                              | ± | 0,26 |
| 35          | 21,02                                            | ± | 0,96 | 19,82                                                        | ± | 0,24 | 21,61                                  | ± | 1,030 | 19,70                                              | ± | 0,30 |
| 40          | 23,22                                            | ± | 0,98 | 21,87                                                        | ± | 0,25 | 23,76                                  | ± | 1,033 | 21,68                                              | ± | 0,31 |
| 44          | 24,23                                            | ± | 0,98 | 23,08                                                        | ± | 0,25 | 24,86                                  | ± | 1,039 | 23,04                                              | ± | 0,32 |
| 47          | 25,26                                            | ± | 0,99 | 24,26                                                        | ± | 0,26 | 25,92                                  | ± | 1,043 | 24,27                                              | ± | 0,32 |
| 51          | 26,44                                            | ± | 0,99 | 25,76                                                        | ± | 0,30 | 27,11                                  | ± | 1,054 | 25,74                                              | ± | 0,33 |
| 54          | 27,62                                            | ± | 1,02 | 26,99                                                        | ± | 0,30 | 28,24                                  | ± | 1,069 | 26,86                                              | ± | 0,33 |
| 58          | 28,94                                            | ± | 1,02 | 28,42                                                        | ± | 0,32 | 29,39                                  | ± | 1,075 | 28,27                                              | ± | 0,35 |
| 68          | 31,35                                            | ± | 1,03 | 32,08                                                        | ± | 0,37 | 31,59                                  | ± | 1,100 | 31,66                                              | ± | 0,36 |
| 78          | 33,28                                            | ± | 1,04 | 34,98                                                        | ± | 0,39 | 33,39                                  | ± | 1,106 | 34,22                                              | ± | 0,37 |
| 82          | 34,38                                            | ± | 1,04 | 36,19                                                        | ± | 0,39 | 34,21                                  | ± | 1,110 | 35,33                                              | ± | 0,38 |
| 89          | 35,66                                            | ± | 1,09 | 37,69                                                        | ± | 0,40 | 35,08                                  | ± | 1,121 | 36,83                                              | ± | 0,39 |
| 97          | 37,07                                            | ± | 1,13 | 39,39                                                        | ± | 0,41 | 36,26                                  | ± | 1,128 | 38,37                                              | ± | 0,40 |
| 103         | 38,17                                            | ± | 1,15 | 40,66                                                        | ± | 0,42 | 37,21                                  | ± | 1,140 | 39,42                                              | ± | 0,40 |
